# Supplementary material for: Diet in Patients with Myocardial Infarction and Coexisting Type 2 Diabetes Mellitus
Source: MDPI journal article supplement (doi:10.3390/ijerph20085442), 2023-04-07

## Figures

Non-dietary lifestyle elements not included in the analysis to maintain the study's integrity

**Figure 1.** Frequency of alcohol consumption: Total (N=67)

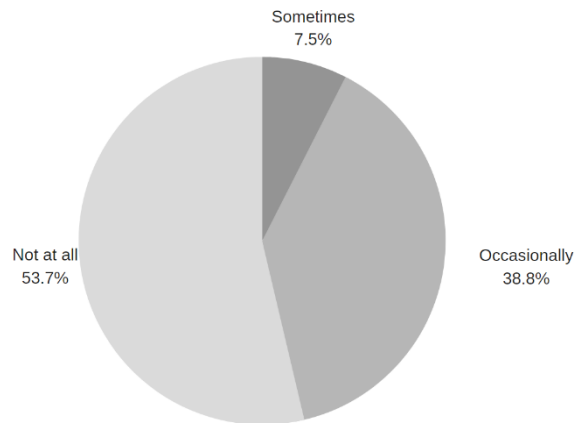

**Figure 2.** Frequency of alcohol consumption: First MI (N=33)

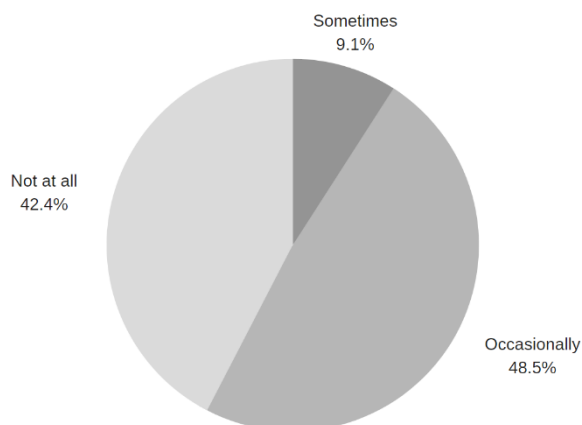

**Figure. 3** Frequency of alcohol consumption: Second MI (N=34)

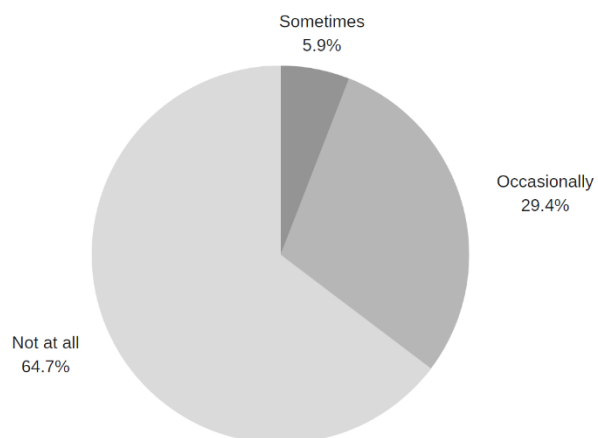

**Figure 4.** Smoking: Total (N=67)

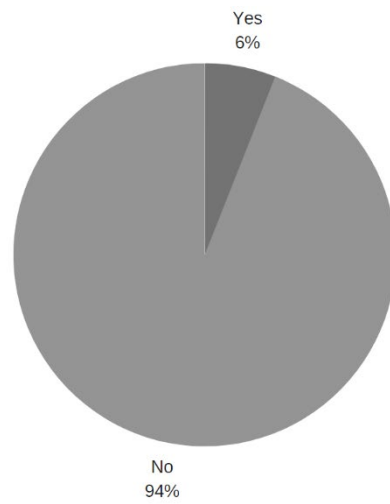

**Figure 5.** Smoking: First MI (N=33)

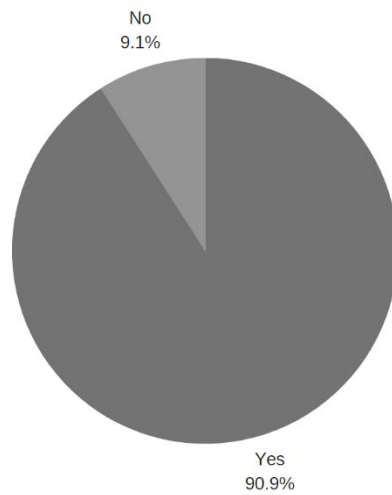

**Figure 6.** Smoking: Second MI (N=34)

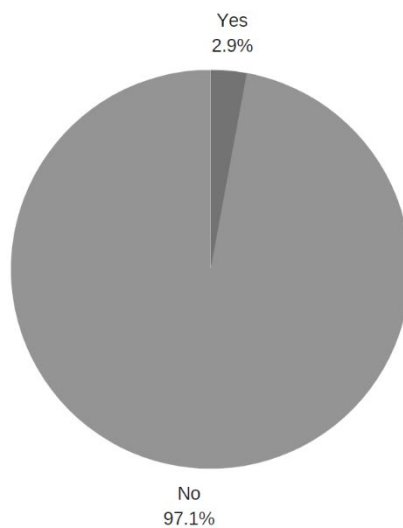

**Figure 7.** Exercise in the past: Total (N=67)

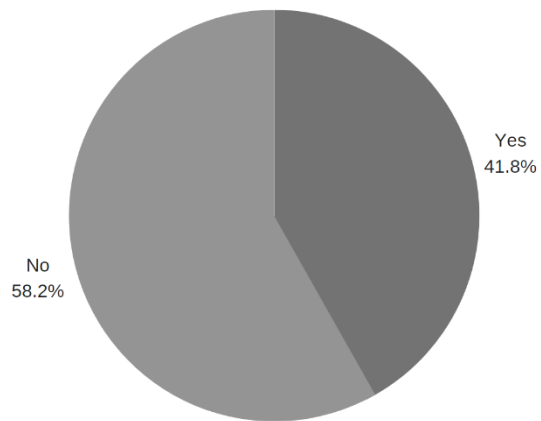

**Figure 8.** Exercise in the past: First MI (N=33)

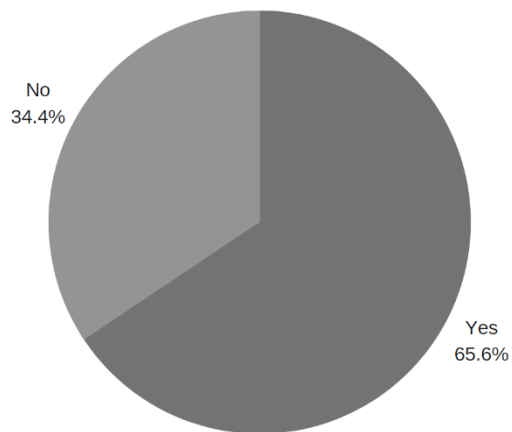

**Figure 9.** Exercise in the past: Second MI (N=34)

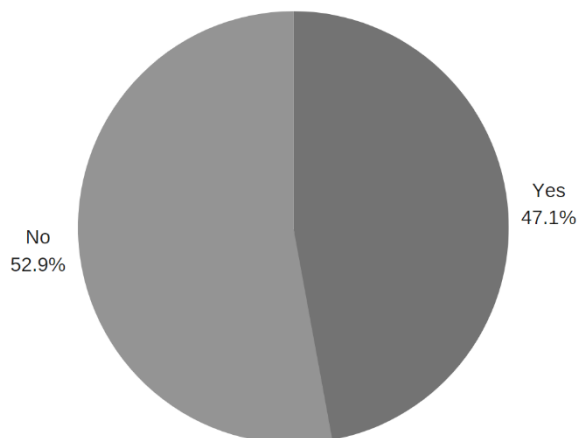

**Figure 10.** Exercise in the future: Total (N=67)

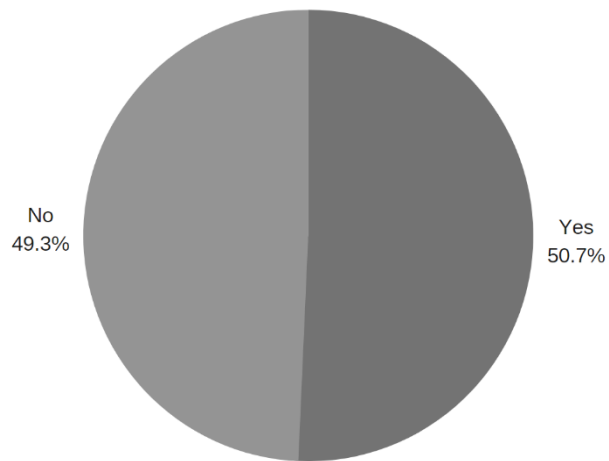

**Figure 11.** Exercise in the future: First MI (N=33)

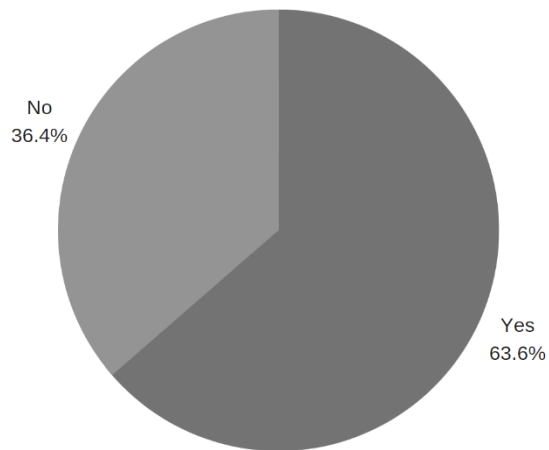

**Figure 12.** Exercise in the future: Second MI (N=34)

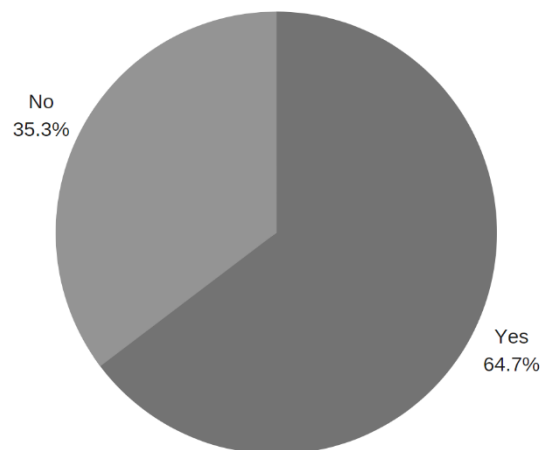

Supplement: s1 [file s1]
